# Supplementary material
Source: PubMed Central journal article supplement (PMC5849263)
Supplement: NIHMS935550-supplement-Supplementary_Material.pdf [file NIHMS935550-supplement-Supplementary_Material.pdf]

## Sleep and olfaction among older adults: Supplementary Material

**Table S1.** Demographics of the NSHAP Wave 2 Olfaction-Sleep subsample and full age eligible population

| Characteristic                                                               | Olfaction-Sleep Subsample |     | Age eligible sample (non-Olfaction-Sleep Subsample) |       | p-value |
|------------------------------------------------------------------------------|---------------------------|-----|-----------------------------------------------------|-------|---------|
|                                                                              | Weighted Value            | N   | Weighted Value                                      | N     |         |
| <b>Age, mean (sd)</b>                                                        | 71.7 (7.5)                | 354 | 72.4 (7.4)                                          | 2,842 | 0.10    |
| <b>Female</b>                                                                | 53.6%                     | 354 | 52.2%                                               | 2,842 | 0.63    |
| <b>Race</b>                                                                  |                           | 354 |                                                     | 2,830 | <0.01   |
| White                                                                        | 82.3%                     |     | 81.5%                                               |       |         |
| African American                                                             | 6.2%                      |     | 9.7%                                                |       |         |
| Hispanic                                                                     | 6.3%                      |     | 6.7%                                                |       |         |
| Other                                                                        | 5.2%                      |     | 2.3%                                                |       |         |
| <b>Modified Charlson Comorbidity</b>                                         |                           | 354 |                                                     | 2,842 | 0.36    |
| 0                                                                            | 48.1%                     |     | 42.4%                                               |       |         |
| 1                                                                            | 25.4%                     |     | 26.1%                                               |       |         |
| 2                                                                            | 14.0%                     |     | 15.8%                                               |       |         |
| 3+                                                                           | 12.4%                     |     | 15.6%                                               |       |         |
| <b>Montreal Cognitive Assessment – Survey Adapted, 0-20 scale, mean (sd)</b> | 14.2 (3.5)                | 354 | 13.8 (4.0)                                          | 2,842 | 0.07    |
| <b>Body Mass Index, mean (sd)</b>                                            | 29.1 (5.50)               | 345 | 29.4 (6.8)                                          | 2,672 | 0.27    |
| <b>Current Smoker</b>                                                        | 13.6%                     | 354 | 13.2%                                               | 2,842 | 0.87    |
| <b>CES-D<sup>1</sup>, mean (sd)</b>                                          | 7.3 (3.3)                 | 354 | 7.8 (3.5)                                           | 2,841 | 0.02    |
| <b>Medication Usage</b>                                                      |                           |     |                                                     |       |         |
| Antidepressants                                                              | 17.4%                     | 334 | 15.4%                                               | 2,679 | 0.39    |
| Sleep Aids                                                                   | 8.7%                      | 334 | 7.4%                                                | 2,679 | 0.42    |
| <b>Actigraph-Measured Sleep</b>                                              |                           | 354 |                                                     | 426   |         |
| WASO <sup>2</sup> (minutes), mean (sd)                                       | 37.5 (22.6)               |     | 39.2 (21.7)                                         |       | 0.31    |
| Total Sleep Time (hours), mean (sd)                                          | 7.2 (1.4)                 |     | 7.2 (1.2)                                           |       | 0.47    |
| Less than 5 hours, %                                                         | 5.5%                      |     | 4.2%                                                |       |         |
| 5 to 8 hours, %                                                              | 70.2%                     |     | 72.5%                                               |       |         |
| More than 8 hours, %                                                         | 24.3%                     |     | 23.4%                                               |       |         |
| Fragmentation, mean (sd)                                                     | 14.2 (5.9)                |     | 14.3 (5.8)                                          |       | 0.68    |
| <b>Self-Reported Sleep Duration (hours), mean (sd)</b>                       | 7.4 (1.3)                 | 287 | 7.4 (1.3)                                           | 379   | 0.81    |
| <b>Troubled Sleep Scale<sup>3</sup>, mean (sd)</b>                           | 2.7 (2.1)                 | 354 | 2.9 (2.1)                                           | 438   | 0.05    |
| <b>Olfactory Function Field Exam</b>                                         |                           |     |                                                     |       |         |
| Odor Identification (score) <sup>4</sup>                                     |                           | 354 |                                                     | 1,740 | 0.12    |
| 0                                                                            | 2.9%                      |     | 3.2%                                                |       |         |
| 1                                                                            | 1.3%                      |     | 2.9%                                                |       |         |
| 2                                                                            | 6.0%                      |     | 6.1%                                                |       |         |
| 3                                                                            | 7.8%                      |     | 11.4%                                               |       |         |

**Table S1.** Demographics of the NSHAP Wave 2 Olfaction-Sleep subsample and full age eligible population

|                                       |       |     |       |       |      |
|---------------------------------------|-------|-----|-------|-------|------|
| 4                                     | 30.7% |     | 32,5% |       |      |
| 5                                     | 51.3% |     | 43.9% |       |      |
| Odor Sensitivity (score) <sup>5</sup> |       | 354 |       | 1,740 | 0.33 |
| 0                                     | 7.1%  |     | 9.5%  |       |      |
| 1                                     | 8.5%  |     | 7.7%  |       |      |
| 2                                     | 12.4% |     | 11.9% |       |      |
| 3                                     | 15.9% |     | 18.2% |       |      |
| 4                                     | 23.8% |     | 25.3% |       |      |
| 5                                     | 25.3% |     | 19.3% |       |      |
| 6                                     | 7.1%  |     | 8.3%  |       |      |

P-values are from t-test or  $\chi^2$  test

<sup>1</sup>CES-D (range:0-22): Center for Epidemiologic Study Depression Scale

<sup>2</sup>Wake after sleep onset

<sup>3</sup>Troubled Sleep Scale (range:0-8) is a combined metric (0 = Never/rarely, 1 = Sometimes, 2 = Most of the time) from four questions: feeling rested in the morning, trouble falling asleep, trouble waking during the night and trouble waking too early

<sup>4</sup>Odor identification (range: 0-5) is measured via correct identification of five odorants: rose, leather, orange, fish, and peppermint.

<sup>5</sup>Odor sensitivity (range: 0-6) is assessed by participants' capacities to detect n-butanol.
